# Supplementary material
Source: MDPI journal article supplement (https://www.mdpi.com/2227-7102/13/6/590)
Supplement: s1 [file s1]

# Developing Critical Thinking in Technical and Vocational Education and Training

## 1. Results of the Appraisal Analysis

### ANALYSIS OF COMMENTS MADE BY THE EXPERIMENTAL GROUP:

| Entity being appraised<br>(What and who are being evaluated) | Evoked and inscribed appraisals                                                           | Discourse analyzed                                                                                                                                                           | Appraisal system:<br>Attitude affect judgement appreciation                                                               | Appraisal system:<br>Engagement monogloss heterogloss | Appraisal system:<br>Graduation focus force |
|--------------------------------------------------------------|-------------------------------------------------------------------------------------------|------------------------------------------------------------------------------------------------------------------------------------------------------------------------------|---------------------------------------------------------------------------------------------------------------------------|-------------------------------------------------------|---------------------------------------------|
| Teacher                                                      | excellent                                                                                 | Excellent teacher!!<br><br>[EXPERIMENTAL]                                                                                                                                    | (+ve)<br>Judgement, social esteem, Capacity (evoked) + graduation                                                         | Monogloss: Assertion                                  | Force: intensifying<br><br>“excellent”      |
| Her classes                                                  | really educational<br><br>practical                                                       | She doesn't use the VLE because she doesn't have it but her classes are really educational and practical despite this<br>[EXPERIMENTAL]                                      | (+ve) ,<br>Reaction, Impact (inscribed) + graduation<br><br>(+ve)<br>Appreciation, Reaction, Impact (evoked) + graduation | Monogloss: Assertion                                  | Force: intensifying<br><br>“really”         |
| Professor Mayra Contreras Soto                               | really good professional<br><br>shows her teaching ability when working with her students | Professor Mayra Contreras Soto is a really good professional who shows her teaching ability when working with her students. In general, she explains the content clearly and | (+ve)<br>Judgement, social esteem, Capacity (evoked) + graduation<br><br>(+ve)<br>Judgement, social esteem,               | Monogloss: Assertion                                  | Force: intensifying<br><br>“really”         |

|                                                                                    |                                                                                            |                                                                                                                                                                                            |                                                                                                                                                                                                     |                      |                                                                                                                                                                        |
|------------------------------------------------------------------------------------|--------------------------------------------------------------------------------------------|--------------------------------------------------------------------------------------------------------------------------------------------------------------------------------------------|-----------------------------------------------------------------------------------------------------------------------------------------------------------------------------------------------------|----------------------|------------------------------------------------------------------------------------------------------------------------------------------------------------------------|
|                                                                                    | explains the content clearly<br><br>answers students' questions really well                | answers students' questions really well.<br>[EXPERIMENTAL]                                                                                                                                 | Capacity (evoked) + graduation<br><br>(+ve)<br>Judgement, social esteem, Capacity (inscribed)<br><br>(+ve)<br>Judgement, social esteem, Capacity (inscribed) + graduation                           |                      | Force: intensifying<br><br>"really"                                                                                                                                    |
| <b>Teacher</b><br><br><b>Your [the teacher's] enthusiasm</b><br><br><b>teacher</b> | excellent<br><br>your enthusiasm changed my mind,<br><br>your sense of vocation is amazing | Excellent teacher. The truth is, in the beginning I wasn't thrilled about taking this class, but your enthusiasm changed my mind, also your sense of vocation is amazing<br>[EXPERIMENTAL] | (+ve)<br>Judgement, social esteem, Capacity (evoked) + graduation<br><br>(+ve) Affect, happiness (inscribed) + graduation.<br><br>(+ve)<br>Judgement, social esteem, Capacity (evoked) + graduation | Monogloss: Assertion | Force: intensifying<br>"Excellent"<br><br>Force: intensifying<br>"changed my mind"<br>emphasizes the high level of enthusiasm.<br><br>Force: intensifying<br>"Amazing" |
| <b>Teacher</b>                                                                     | excellent<br><br>motivated to teach and help get the best out of her students              | An excellent teacher, motivated to teach and help get the best out of her students.<br>[EXPERIMENTAL]                                                                                      | (+ve)<br>Judgement, social esteem, Capacity (evoked) + graduation<br><br>(+ve)<br>Judgement,                                                                                                        | Monogloss: Assertion | Force: intensifying<br><br>"excellent"                                                                                                                                 |

|                            |                                                                                                                          |                                                                                                                                                |                                                                                                                                                                                                                                           |                         |                                           |
|----------------------------|--------------------------------------------------------------------------------------------------------------------------|------------------------------------------------------------------------------------------------------------------------------------------------|-------------------------------------------------------------------------------------------------------------------------------------------------------------------------------------------------------------------------------------------|-------------------------|-------------------------------------------|
|                            |                                                                                                                          |                                                                                                                                                | social esteem,<br>Capacity<br>(evoked) +<br>graduation                                                                                                                                                                                    |                         |                                           |
| <b>Woman [the teacher]</b> | empowered<br><br>intelligent<br><br>admire a lot                                                                         | An empowered and intelligent woman. I admire her a lot.<br>[EXPERIMENTAL]                                                                      | (+ve)<br>Judgement,<br>social esteem,<br>Capacity<br>(evoked) +<br>graduation<br><br>(+ve)<br>Judgement,<br>social esteem,<br>Capacity<br>(inscribed) +<br>graduation<br><br>(+ve) Affect,<br>satisfaction<br>(inscribed) +<br>graduation | Monogloss:<br>Assertion | Force:<br>intensifying<br><br>“a lot”     |
| <b>Teacher</b>             | excellent                                                                                                                | Excellent teacher<br><br>[EXPERIMENTAL]                                                                                                        | (+ve)<br>Judgement,<br>social esteem,<br>Capacity<br>(evoked) +<br>graduation                                                                                                                                                             | Monogloss:<br>Assertion | Force:<br>intensifying<br><br>“excellent” |
| <b>The class</b>           | really<br>interactive<br><br>allows for a<br>pleasant<br>environment<br><br>helps when it<br>comes to the<br>assessments | It's a really interactive class, which allows for a pleasant environment and this helps when it comes to the assessments<br><br>[EXPERIMENTAL] | (+ve)<br>Appreciation,<br>Reaction,<br>Impact<br>(inscribed) +<br>graduation<br><br>(+ve)<br>Appreciation,<br>Reaction,<br>Impact                                                                                                         | Monogloss:<br>Assertion | Force:<br>intensifying<br><br>“really”    |

|                                                                              |                                                               |                                                                                                                                                                                                                  |                                                                                                                                                   |                         |                                                                                         |
|------------------------------------------------------------------------------|---------------------------------------------------------------|------------------------------------------------------------------------------------------------------------------------------------------------------------------------------------------------------------------|---------------------------------------------------------------------------------------------------------------------------------------------------|-------------------------|-----------------------------------------------------------------------------------------|
|                                                                              |                                                               |                                                                                                                                                                                                                  | (inscribed) +<br>graduation<br><br>(+ve)<br>Appreciation,<br>Reaction,<br>Impact<br>(inscribed) +<br>graduation                                   |                         |                                                                                         |
| <b>Learning system [methodology]</b>                                         | really good                                                   | Really good learning system<br><br>[EXPERIMENTAL]                                                                                                                                                                | (+ve)<br>Appreciation,<br>Reaction,<br>Impact<br>(inscribed) +<br>graduation                                                                      | Monogloss:<br>Assertion | Force:<br>intensifying<br><br>“really”                                                  |
| <b>way the teacher teaches [class methodology]</b><br><br><b>the teacher</b> | really educational<br><br>show you your individual weaknesses | I find that the way the teacher teaches is really education, while she also tries to show you your individual weaknesses. I hope they show us how get even more out of how we use language<br><br>[EXPERIMENTAL] | (+ve)<br>Appreciation,<br>Reaction,<br>Impact<br>(inscribed) +<br>graduation<br><br>(+ve)<br>Judgement,<br>social esteem,<br>Capacity<br>(evoked) | Monogloss:<br>Assertion | Force:<br>intensifying<br><br>“really”                                                  |
| <b>Teacher</b>                                                               | excellent<br><br>friendly                                     | Excellent teacher, really friendly to her students.<br><br>[EXPERIMENTAL]                                                                                                                                        | (+ve)<br>Judgement,<br>social esteem,<br>Capacity<br>(evoked) +<br>graduation<br><br>(+ve) Affect,<br>happiness<br>(inscribed)                    | Monogloss:<br>Assertion | Force:<br>intensifying<br><br>“excellent”<br><br>Force:<br>intensifying<br><br>“really” |

|                        |                                                      |                                                                                      |                                                                                                                                     |                      |                                                                                                                                   |
|------------------------|------------------------------------------------------|--------------------------------------------------------------------------------------|-------------------------------------------------------------------------------------------------------------------------------------|----------------------|-----------------------------------------------------------------------------------------------------------------------------------|
| <b>The teacher</b>     | a lovely person                                      | The teacher is a lovely person<br><br>[EXPERIMENTAL]                                 | (+ve) Affect, happiness (evoked)                                                                                                    | Monogloss: Assertion | Force: intensifying<br><br>“a lovely person”<br>Intensifies the idea of friendliness and other positive qualities of the teacher. |
| <b>Dynamic Teacher</b> | excellent<br><br>really good                         | Excellent dynamic in class and a really good teacher<br><br>[EXPERIMENTAL]           | (+ve) Appreciation, Reaction, Impact (inscribed) + graduation<br><br>(+ve) Judgement, social esteem, Capacity (evoked) + graduation | Monogloss: Assertion | Force: intensifying<br><br>“excellent”<br><br>Force: intensifying<br><br>“really”                                                 |
| <b>Teacher</b>         | good                                                 | Good teacher<br><br>[EXPERIMENTAL]                                                   | (+ve) Judgement, social esteem, Capacity (evoked)                                                                                   | Monogloss: Assertion |                                                                                                                                   |
| <b>Way of teaching</b> | excellent<br><br>manages to get everyone’s attention | Excellent way of teaching, manages to get everyone’s attention<br><br>[EXPERIMENTAL] | (+ve) Appreciation, Reaction, Impact (evoked) + graduation<br><br>(+ve) Appreciation, Reaction, Impact                              | Monogloss: Assertion | Force: intensifying<br><br>“excellent”<br><br>Force: intensifying<br><br>“Manages to get everyone’s attention”                    |

|                                           |           |                                         |                                                                           |                         |                                                                          |
|-------------------------------------------|-----------|-----------------------------------------|---------------------------------------------------------------------------|-------------------------|--------------------------------------------------------------------------|
|                                           |           |                                         | (inscribed) +<br>graduation                                               |                         | Intensifies<br>the idea that<br>the way of<br>teaching is<br>attractive. |
| <b>Service<br/>[teaching<br/>methods]</b> | excellent | Excellent service<br><br>[EXPERIMENTAL] | (+ve)<br>Appreciation,<br>Reaction,<br>Impact<br>(evoked) +<br>graduation | Monogloss:<br>Assertion | Force:<br>intensifying<br><br>“excellent”                                |
| <b>Teacher</b>                            | excellent | Excellent teacher<br><br>[EXPERIMENTAL] | (+ve)<br>Judgement,<br>social esteem<br>(evoked) +<br>graduation          | Monogloss:<br>Assertion | Force:<br>intensifying<br><br>“excellent”                                |

TABLE 2: ANALYSIS OF COMMENTS MADE BY THE CONTROL GROUP:

| Entity being appraised<br>(What and who are being evaluated) | Evoked and inscribed appraisals                                      | Discourse analyzed                                               | Appraisal system: Attitude affect judgement appreciation                                                                                                 | Appraisal system: Engagement monogloss heterogloss | Appraisal system: Graduation focus force                                                                                                                                                  |
|--------------------------------------------------------------|----------------------------------------------------------------------|------------------------------------------------------------------|----------------------------------------------------------------------------------------------------------------------------------------------------------|----------------------------------------------------|-------------------------------------------------------------------------------------------------------------------------------------------------------------------------------------------|
| Teacher                                                      | Excellent<br><br><br><br><br><br><br><br><br><br>Nothing more to say | Excellent teacher, nothing more to say<br><br>[CONTROL]          | (+ve) Judgement, social esteem, Capacity (evoked) + graduation<br><br><br><br><br><br><br>(+ve) Judgement, social esteem, Capacity (evoked) + graduation | Monogloss: Assertion                               | Force: intensifying<br><br>“excellent”<br><br>Force: intensifying<br>‘Nothing more to say’ an expression that helps exaggerate and emphasize the main idea that the teacher is excellent. |
| Some students                                                | Don’t let the class run smoothly                                     | Some students don’t let the class run smoothly.<br><br>[CONTROL] | (-ve) Judgement, Social sanction, Propriety (inscribed) + graduation                                                                                     | Monogloss: Assertion                               | Force: intensifying<br>“smoothly”                                                                                                                                                         |

|                                      |                                         |                                                                               |                                                                                                                     |                      |                                     |
|--------------------------------------|-----------------------------------------|-------------------------------------------------------------------------------|---------------------------------------------------------------------------------------------------------------------|----------------------|-------------------------------------|
| <b>[the teacher]</b>                 | I didn't learn how to write an email :( | She made me read and I didn't learn how to write an email :(<br><br>[CONTROL] | (-ve) Judgement, Social esteem, Capacity (inscribed)                                                                | Monogloss: Assertion |                                     |
| <b>The subject</b>                   | hate                                    | It's nothing personal, but I hate this subject!<br>[CONTROL]                  | (-ve) Affect, dissatisfaction (inscribed) + graduation.                                                             | Monogloss: Assertion | Force: intensifying<br><br>"hate"   |
| <b>Teacher</b><br><br><b>Subject</b> | good<br><br>really practical            | Good teacher, good at explaining a really practical subject<br>[CONTROL]      | (+ve) Judgement, social esteem, Capacity (evoked)<br><br>(+ve) Appreciation, Reaction, Impact (evoked) + graduation | Monogloss: Assertion | Force: intensifying<br><br>"really" |
| <b>Teacher</b>                       | really good                             | She's a really good teacher.<br>[CONTROL]                                     | (+ve) Judgement, social esteem, Capacity (evoked) + graduation                                                      | Monogloss: Assertion | Force: intensifying<br><br>"really" |

|                                                  |                                                                                                         |                                                                                                                                          |                                                                                                                                                                                                            |                      |                                                                           |
|--------------------------------------------------|---------------------------------------------------------------------------------------------------------|------------------------------------------------------------------------------------------------------------------------------------------|------------------------------------------------------------------------------------------------------------------------------------------------------------------------------------------------------------|----------------------|---------------------------------------------------------------------------|
| <b>[The teacher]</b>                             | really clearly                                                                                          | Explains things really clearly<br>[CONTROL]                                                                                              | (+ve) Judgement, social esteem, Capacity (inscribed) + graduation                                                                                                                                          | Monogloss: Assertion | Force: intensifying<br><br>“really”                                       |
| <b>Teacher</b>                                   | good<br><br>clarifies doubts<br><br>has good knowledge of the subject for interacting with the students | Good teacher, clarifies doubts, has good knowledge of the subject for interacting with the students.<br>[CONTROL]                        | (+ve) Judgement, social esteem, Capacity (evoked) + graduation<br><br>(+ve) Judgement, social esteem, Capacity (evoked) + graduation<br><br>(+ve) Judgement, social esteem, Capacity (evoked) + graduation | Monogloss: Assertion |                                                                           |
| <b>Teacher</b>                                   | excellent                                                                                               | Excellent teacher<br>[CONTROL]                                                                                                           | (+ve) Judgement, social esteem, Capacity (evoked) + graduation                                                                                                                                             | Monogloss: Assertion | Force: intensifying<br><br>“excellent”                                    |
| <b>The teacher</b><br><br><b>Another teacher</b> | teaches really well<br><br>teaches amazingly                                                            | The teacher teaches really well, you understand everything and has she had to go now we have another teacher that also teaches amazingly | (+ve) Judgement, social esteem, Capacity (inscribed) + graduation<br><br>(+ve) Judgement, social esteem, Capacity (inscribed) + graduation                                                                 | Monogloss: Assertion | Force: intensifying<br>“really”<br><br>Force: intensifying<br>“amazingly” |

|                                |                       |                                                                       |                                                                                                                                                      |                         |                                       |
|--------------------------------|-----------------------|-----------------------------------------------------------------------|------------------------------------------------------------------------------------------------------------------------------------------------------|-------------------------|---------------------------------------|
|                                |                       | [CONTROL]                                                             |                                                                                                                                                      |                         |                                       |
| [the teacher]                  | good                  | Good<br>[CONTROL]                                                     | (+ve) Judgement,<br>social esteem,<br>Capacity (evoked)                                                                                              | Monogloss:<br>Assertion |                                       |
| [the teacher]                  | excellent             | Excellent<br>[CONTROL]                                                | (+ve) Judgement,<br>social esteem,<br>Capacity (evoked)                                                                                              | Monogloss:<br>Assertion | Force:<br>intensifying<br>“excellent” |
| information<br><br>environment | clear<br><br>pleasant | Clear<br>information<br>and pleasant<br>environment.<br><br>[CONTROL] | (+ve) Appreciation,<br>Reaction, Impact<br>(inscribed) +<br>graduation<br><br>(+ve) Appreciation,<br>Reaction, Impact<br>(inscribed) +<br>graduation | Monogloss:<br>Assertion |                                       |
| [The teacher]                  | teaches<br>well       | She teaches<br>well!<br><br>[CONTROL]                                 | (+ve) Judgement,<br>social esteem,<br>Capacity (inscribed)                                                                                           | Monogloss:<br>Assertion |                                       |

|               |                   |                                                |                                                                            |                         |                                    |
|---------------|-------------------|------------------------------------------------|----------------------------------------------------------------------------|-------------------------|------------------------------------|
| [The teacher] | really<br>clearly | Explains things<br>really clearly<br>[CONTROL] | (+ve) Judgement,<br>social esteem,<br>Capacity (inscribed) +<br>graduation | Monogloss:<br>Assertion | Force:<br>intensifying<br>“really” |
|---------------|-------------------|------------------------------------------------|----------------------------------------------------------------------------|-------------------------|------------------------------------|
