# Supplementary material
Source: MDPI journal article supplement (https://www.mdpi.com/2227-7102/13/6/590)
Supplement: s1 [file s1]

# Examples of questions that address culturally relevant issues

## From the Pre-test

### Short-story

*A loud explosion is heard. I'm scared, my children too. He asks me: "What is that, mom?" "It's fireworks honey, don't worry". My heart starts racing, I hear desperate screams. Again there's a shootout between the two gangs of this neighbourhood. I hug my son and begin mentally counting how much money I'm missing to move out.*

Author: Sandy González, 25 years old, Recoleta, Chile.

### Question IC18

Why the mom tells her son that the shooting is fireworks?

- A. So he stops asking questions
- B. So he doesn't realize that there is a shootout (CORRECT)
- C. So he thinks it's new year eve
- D. So he can go back to sleep

## From the Post-test

### Short-story

#### **Salem**

I knew you lived there. You didn't wait for me, as you didn't know who I was. I thought you were different, more skinny and smaller. When I got through the door I felt the cold winds of August. I didn't know the temperatures were much lower than in Venezuela. Uncle Francisco told me you were in the room, and that you didn't get out of the closet. I understand that you haven't been adopted yet. You're new, just like me. We have something in common. When I got next to you, I looked into your eyes, and I fell in love with you, dear kitten.

Author: Anabella Galavis, 11 years old, Santiago, Chile.

## Question IC17

What can be inferred from the protagonist of the short story "Salem"?

- A. She was a neighbour of his Uncle Francisco
- B. She wasn't chilean (CORRECT)
- C. She had planned to see the kitten long time ago
- D. Cats were her favourite animal
