# Supplementary material
Source: MDPI journal article supplement (https://www.mdpi.com/2227-7102/13/6/590)
Supplement: s1 [file s1]

# Developing Critical Thinking in Technical and Vocational Education and Training

## 1. Teacher Survey

*(Invitation to students)*

Dear Student,

We invite you to complete the following survey, which will help us understand your experience with each of your teachers for your current classes. The information you provide is very important as it allows us to continuously improve the level of teaching within our institution.

The responses you provide are confidential and will only be used for the purposes mentioned above.

Answering the survey is simple: mark just **ONE** of the alternatives for each question and/or statement.  
Thank you for your time.

| I. With regards to the teacher: |    |                                                                                       | Strongly disagree | Disagree | Agree | Strongly agree |
|---------------------------------|----|---------------------------------------------------------------------------------------|-------------------|----------|-------|----------------|
| Knowledge of the subject        | 1  | Shows mastery and knowledge of the subject.                                           |                   |          |       |                |
| Classroom environment           | 2  | Is respectful towards the students.                                                   |                   |          |       |                |
| Classroom environment           | 3  | Fosters a positive classroom environment.                                             |                   |          |       |                |
| Classroom environment           | 4  | Encourages student participation in class.                                            |                   |          |       |                |
| Communication                   | 5  | Clearly explains the content of the course.                                           |                   |          |       |                |
| Planning                        | 6  | Explains how the content will be assessed.                                            |                   |          |       |                |
| Communication                   | 7  | Relates practical activities to the theoretical content of the class.                 |                   |          |       |                |
| Motivation and leadership       | 8  | Includes activities that allow the students to exchange ideas.                        |                   |          |       |                |
| Communication                   | 9  | Shows a willingness to clarify doubts and/or answer questions during class            |                   |          |       |                |
| Planning                        | 10 | Gives feedback after formal assessments so as to promote learning among the students. |                   |          |       |                |
| Planning                        | 11 | Assesses the content covered during the course.                                       |                   |          |       |                |
| Motivation and leadership       | 12 | Encourages student learning.                                                          |                   |          |       |                |

|     |    |                                                                                                                               |                   |          |       |                |
|-----|----|-------------------------------------------------------------------------------------------------------------------------------|-------------------|----------|-------|----------------|
| VLE | 13 | During the course they used the Virtual Learning Environment (VLE)<br>a) Yes (go to question 14)<br>b) No (go to question 16) | Strongly disagree | Disagree | Agree | Strongly agree |
| VLE | 14 | The information available in the VLE is useful for my learning process.                                                       |                   |          |       |                |
| VLE | 15 | The teacher answers questions and doubts through the VLE.                                                                     |                   |          |       |                |

**II. Considering your experience this semester and using a scale from 1 to 7, where 1 means very unsatisfied and 7 very satisfied:**

16. How would you rate your overall experience with the teacher who taught this class?

|                  |   |   |   |   |   |   |   |                |
|------------------|---|---|---|---|---|---|---|----------------|
| Very unsatisfied | 1 | 2 | 3 | 4 | 5 | 6 | 7 | Very satisfied |
|------------------|---|---|---|---|---|---|---|----------------|

**III. Comments:**
